# Supplementary material
Source: PubMed Central journal article supplement (PMC5564317)
Supplement: NIHMS891830-supplement-Sup_Table1.pdf [file NIHMS891830-supplement-Sup_Table1.pdf]

Supplementary Table 1: List of Antibodies Used

| <b>Antibody</b>                   | <b>Company</b> | <b>Dilution</b> |
|-----------------------------------|----------------|-----------------|
| 4E-BP1 (S65)                      | CellSig        | 1:50            |
| 4E-BP1 (T70)                      | CellSig        | 1:100           |
| Acetyl-CoA Carboxylase (S79)      | CellSig        | 1:50            |
| Ack1 (Y284)                       | CellSig        | 1:50            |
| Ack1 (Y857/858)                   | CellSig        | 1:100           |
| Akt (S473)                        | CellSig        | 1:100           |
| Akt (T308)                        | CellSig        | 1:100           |
| ALK (Y1586)                       | CellSig        | 1:500           |
| AMPKalpha1 (S485)                 | CellSig        | 1:50            |
| AMPKBeta1 (S108)                  | CellSig        | 1:50            |
| A-Raf (S299)                      | CellSig        | 1:100           |
| Aurora A (T288)/B (T232)/C (T198) | CellSig        | 1:50            |
| Bad (S112)                        | CellSig        | 1:200           |
| Bad (S136)                        | CellSig        | 1:100           |
| Bad (S155)                        | CellSig        | 1:100           |
| Bcl-2 (S70)                       | CellSig        | 1:100           |
| Bcl-2 (T56)                       | CellSig        | 1:200           |
| Beclin 1, total                   | CellSig        | 1:100           |
| B-Raf (S445)                      | CellSig        | 1:50            |
| c-Abl (T735)                      | CellSig        | 1:50            |
| c-Abl (Y245)                      | CellSig        | 1:100           |
| Caspase 3, cleaved (D175)         | CellSig        | 1:50            |
| Caspase 7, cleaved (D198)         | CellSig        | 1:100           |
| Caspase 9, cleaved (D315)         | CellSig        | 1:100           |
| Caspase 9, cleaved (D330)         | CellSig        | 1:50            |
| Chk1 (S345)                       | CellSig        | 1:50            |
| Chk2 (S33/35)                     | CellSig        | 1:50            |
| cKIT (Y719)                       | CellSig        | 1:50            |
| Cofilin (S3)                      | CellSig        | 1:1000          |
| cPLA2 (S505)                      | CellSig        | 1:1000          |
| CREB (S133)                       | CellSig        | 1:1000          |
| CrklI (Y221)                      | CellSig        | 1:100           |
| Cyclin B1, total                  | CellSig        | 1:200           |
| Cyclin D1, total                  | BD             | 1:100           |
| Cyclin E, total                   | BD             | 1:100           |
| EGFR, total                       | CellSig        | 1:100           |
| EGFR (S1046/1047)                 | CellSig        | 1:500           |
| EGFR (Y1045)                      | CellSig        | 1:50            |

|                                       |           |        |
|---------------------------------------|-----------|--------|
| EGFR (Y1068)                          | CellSig   | 1:50   |
| EGFR (Y1148)                          | Biosource | 1:100  |
| EGFR (Y1173)                          | Biosource | 1:100  |
| EGFR (Y845)                           | CellSig   | 1:1000 |
| EGFR (Y992)                           | CellSig   | 1:50   |
| eIF4E (S209)                          | CellSig   | 1:100  |
| eIF4G (S1108)                         | CellSig   | 1:1000 |
| Elk-1 (S383)                          | CellSig   | 1:200  |
| eNOS (S113)                           | CellSig   | 1:50   |
| ErbB2/HER2, total                     | DAKO      | 1:1000 |
| ErbB2/HER2 (Y1248)                    | Upstate   | 1:500  |
| ErbB3/HER3, total                     | CellSig   | 1:500  |
| ErbB3 (Y1197)                         | CST       | 1:100  |
| ErbB3/HER3 (Y1289)                    | CellSig   | 1:200  |
| ErbB4/HER4, total                     | CellSig   | 1:50   |
| ERK 1/2 (T202/Y204)                   | CellSig   | 1:1000 |
| Estrogen Receptor alpha, total        | Dako      | 1:50   |
| Estrogen Receptor alpha (S118)        | CellSig   | 1:1000 |
| FADD (S194)                           | CellSig   | 1:50   |
| FAK (Y397)                            | BD        | 1:500  |
| FAK (Y576/577)                        | CellSig   | 1:200  |
| FOXO3 (S253)                          | CellSig   | 1:50   |
| FOXO1 (S256)                          | CellSig   | 1:100  |
| FOXO1/O3 (T24/T32)                    | CellSig   | 1:200  |
| GSK-3 alpha/beta (S21/9)              | CellSig   | 1:200  |
| Histone H3 (S10)                      | Upstate   | 1:500  |
| IGF-1 Rec (Y1131)/Insulin Rec (Y1146) | CellSig   | 1:500  |
| IGF-1R (Y1135/36)/IR (Y1150/51)       | CellSig   | 1:1000 |
| IkappaB-alpha (S32/36)                | CellSig   | 1:50   |
| IRS-1 (S612)                          | CellSig   | 1:200  |
| Jak1 (Y1022/1023)                     | CellSig   | 1:50   |
| Jak2 (Y1007/1008)                     | CellSig   | 1:100  |
| LIMK1 (T508)/LIMK2 (T505)             | CellSig   | 1:100  |
| LKB1 (S334)                           | CellSig   | 1:50   |
| MARCKS (S152/156)                     | CellSig   | 1:50   |
| MEK1/2 (S217/221)                     | CellSig   | 1:500  |
| MSK1 (S360)                           | CellSig   | 1:50   |
| Mst1 (T183)/Mst2 (T180)               | CellSig   | 1:50   |
| mTOR (S2448)                          | CellSig   | 1:100  |
| mTOR (S2481)                          | CellSig   | 1:100  |
| Nanog, total                          | CellSig   | 1:1000 |

|                                                          |              |         |
|----------------------------------------------------------|--------------|---------|
| NF-kappaB p65 (S536)                                     | CellSig      | 1:50    |
| Notch1, total                                            | Millipore    | 1:10000 |
| p27 (T187)                                               | Zymed        | 1:200   |
| p38 MAP Kinase (T180/Y182)                               | CellSig      | 1:50    |
| p53, total                                               | CellSig      | 1:5000  |
| p70 S6 Kinase (S371)                                     | CellSig      | 1:50    |
| p70 S6 Kinase (T389)                                     | CellSig      | 1:50    |
| p90RSK (S380)                                            | CellSig      | 1:200   |
| PAK1 (S199/204)/PAK2 (S192/197)                          | CellSig      | 1:50    |
| PAK1 (T423)/PAK2 (T402)                                  | CellSig      | 1:100   |
| PARP, cleaved (D214)                                     | CellSig      | 1:100   |
| Paxillin (Y118)                                          | CellSig      | 1:500   |
| PDGF Receptor beta (Y751)                                | CellSig      | 1:50    |
| PDK1 (S241)                                              | CellSig      | 1:200   |
| PKA C (T197)                                             | CellSig      | 1:200   |
| PKC alpha (S657)                                         | Upstate      | 1:1000  |
| PKC alpha/beta II (T638/641)                             | CellSig      | 1:50    |
| PKC theta (T538)                                         | CellSig      | 1:100   |
| PKC zeta/lambda (T410/403)                               | CellSig      | 1:50    |
| PKCdelta (T505)                                          | CellSig      | 1:100   |
| PLCgamma1 (Y783)                                         | CellSig      | 1:100   |
| PLK1 (T210)                                              | BD           | 1:200   |
| PRAS40 (T246)                                            | Biosource    | 1:1000  |
| PTEN, total                                              | CellSig      | 1:50    |
| PTEN (S380)                                              | CellSig      | 1:500   |
| Pyk2 (Y402)                                              | CellSig      | 1:200   |
| Raf (S259)                                               | CellSig      | 1:100   |
| Ras-GRF1 (S916)                                          | CellSig      | 1:50    |
| Ret (Y905)                                               | CellSig      | 1:100   |
| RSK3 (T356/S360)                                         | CellSig      | 1:500   |
| S6 Ribosomal Protein (S240/244)                          | CellSig      | 1:1000  |
| Shc (Y317)                                               | Upstate      | 1:200   |
| Smad1 (S463/S465)/Smad5<br>(S463/S465)/Smad8 (S426/S428) | CellSig      | 1:50    |
| Smad2 (S245/250/255)                                     | CellSig      | 1:100   |
| Smad2 (S465/467)                                         | CellSig      | 1:250   |
| Src (Y527)                                               | CellSig      | 1:250   |
| Src Family (Y416)                                        | CellSig      | 1:250   |
| ST6GALNAC5, total                                        | Aviva System | 1:50    |
| Stat1 (Y701)                                             | CellSig      | 1:1000  |
| Stat3 (S727)                                             | CellSig      | 1:100   |
| Stat3 (Y705)                                             | Upstate      | 1:200   |

|                      |         |       |
|----------------------|---------|-------|
| Stat5 (Y694)         | CellSig | 1:100 |
| Tuberin/TSC2 (Y1571) | CellSig | 1:50  |
| VEGFR 2 (Y1175)      | CellSig | 1:50  |
| VEGFR 2 (Y951)       | CellSig | 1:200 |
| VEGFR 2 (Y996)       | CellSig | 1:50  |

---
