# Supplementary material
Source: PubMed Central journal article supplement (PMC5564317)
Supplement: NIHMS891830-supplement-Sup_Table_2.pdf [file NIHMS891830-supplement-Sup_Table_2.pdf]

| GMU Sample ID    | 4E-BP1 S65 | 4E-BP1 T70 | Acetyl CoA Carboxylase S79 | Ack1 Y284 |
|------------------|------------|------------|----------------------------|-----------|
| 12G (Breast Met) | 30486      | 17564      | 48533                      | 5579      |
| 28G (Breast Met) | 21441      | 15137      | 11076                      | 5403      |
| 42G (Breast Met) | 14274      | 9896       | 16395                      | 7656      |
| 5G (Breast Met)  | 41565      | 24847      | 150249                     | 9836      |
| 16G (Breast Met) | 18522      | 11890      | 38755                      | 8889      |
| 1G (Breast Met)  | 38980      | 24840      | 135951                     | 8716      |
| 24G (Breast Met) | 24736      | 13031      | 16800                      | 9256      |
| 26G (Breast Met) | 15652      | 17985      | 26372                      | 7546      |
| 3G (Breast Met)  | 11690      | 8969       | 3870                       | 7323      |
| 7G (Breast Met)  | 21192      | 11924      | 32886                      | 5135      |
| 11G (Lung Met)   | 14422      | 16425      | 0                          | 7985      |
| 25G (Lung Met)   | 19074      | 10542      | 0                          | 9523      |
| 31G (Lung Met)   | 25986      | 17256      | 16739                      | 9336      |
| 33G (Lung Met)   | 16753      | 14144      | 191004                     | 10256     |
| 35G (Lung Met)   | 18735      | 25466      | 32539                      | 9153      |
| 43G (Lung Met)   | 20500      | 21394      | 28003                      | 9426      |
| 48G (Lung Met)   | 9005       | 14988      | 9466                       | 4999      |
| 4G (Lung Met)    | 14109      | 21669      | 64558                      | 5901      |
| 6G (Lung Met)    | 22845      | 13454      | 10442                      | 7930      |
| 13G (Lung Met)   | 16941      | 13202      | 82454                      | 6717      |
| 15G (Lung Met)   | 12292      | 11831      | 4567                       | 20042     |
| 17G (Lung Met)   | 17284      | 12744      | 25213                      | 7109      |
| 19G (Lung Met)   | 41176      | 28906      | 43512                      | 5736      |
| 21G (Lung Met)   | 28091      | 15240      | 10977                      | 6137      |
| 23G (Lung Met)   | 14782      | 14911      | 32699                      | 8655      |
| 27G (Lung Met)   | 19358      | 15397      | 22473                      | 7339      |
| 29G (Lung Met)   | 25012      | 20376      | 40137                      | 10766     |
| 2G (Lung Met)    | 13702      | 15578      | 35779                      | 5515      |
| 37G (Lung Met)   | 10292      | 12369      | 18141                      | 11934     |
| 39G (Lung Met)   | 12572      | 11888      | 22811                      | 7705      |
| 41G (Lung Met)   | 22249      | 11537      | 40746                      | 6895      |
| 44G (Lung Met)   | 15883      | 11368      | 61084                      | 10729     |
| 45G (Lung Met)   | 9057       | 8509       | 92060                      | 11939     |
| 46G (Lung Met)   | 8032       | 6704       | 13451                      | 8818      |
| 47G (Lung Met)   | 11906      | 10138      | 16515                      | 20974     |
| 49G (Lung Met)   | 13739      | 11592      | 13116                      | 9141      |
| 50G (Lung Met)   | 10783      | 17934      | 6792                       | 9488      |
| 51G (Lung Met)   | 8826       | 9965       | 11500                      | 4847      |
| 52G (Lung Met)   | 18655      | 12121      | 9401                       | 10532     |
| 53G (Lung Met)   | 12180      | 11308      | 13011                      | 7144      |
| 54G (Lung Met)   | 13338      | 12735      | 26017                      | 6895      |
| 8G (Lung Met)    | 26635      | 23622      | 45435                      | 8461      |

| Ack1 Y857/858 | Adducin S662 | Akt S473 | AKT T308 | Alk Y1586 | AMPK alpha1 S485 | AMPK beta1 S108 |
|---------------|--------------|----------|----------|-----------|------------------|-----------------|
| 5468          | 29602        | 8177     | 34202    | 0         | 11165            | 7519            |
| 6464          | 46175        | 1634     | 12038    | 2950      | 25727            | 13021           |
| 0             | 29891        | 21263    | 81228    | 0         | 8309             | 2585            |
| 4299          | 40337        | 2719     | 111861   | 0         | 26909            | 8359            |
| 1919          | 16171        | 20181    | 63324    | 0         | 12167            | 4531            |
| 4507          | 32860        | 113556   | 94845    | 0         | 22307            | 14388           |
| 0             | 25578        | 200797   | 169812   | 0         | 18179            | 7183            |
| 0             | 15639        | 20313    | 65187    | 0         | 22137            | 7196            |
| 2455          | 26506        | 65513    | 184428   | 0         | 4980             | 0               |
| 1417          | 18124        | 52618    | 138000   | 0         | 7095             | 3388            |
| 3943          | 48072        | 0        | 31417    | 0         | 19725            | 8497            |
| 0             | 24222        | 0        | 71369    | 0         | 16883            | 3046            |
| 0             | 37991        | 1330     | 25722    | 0         | 49513            | 8515            |
| 2877          | 19824        | 1938     | 11802    | 0         | 28001            | 5887            |
| 4500          | 45936        | 5442     | 24835    | 0         | 36865            | 11900           |
| 0             | 78827        | 17769    | 68190    | 0         | 19713            | 5257            |
| 0             | 36019        | 1832     | 30811    | 0         | 23624            | 4809            |
| 2031          | 39735        | 1654     | 34030    | 0         | 11566            | 5249            |
| 2589          | 26511        | 0        | 15939    | 0         | 4745             | 2812            |
| 2406          | 85004        | 2188     | 19625    | 0         | 13051            | 3758            |
| 731           | 21422        | 5582     | 13782    | 0         | 17703            | 5392            |
| 1313          | 40948        | 19101    | 25720    | 0         | 31895            | 10258           |
| 2687          | 58151        | 1805     | 17527    | 0         | 34201            | 14375           |
| 2812          | 28001        | 2059     | 14913    | 560       | 34034            | 8149            |
| 2200          | 38561        | 10730    | 20869    | 0         | 28284            | 8380            |
| 5730          | 35596        | 98716    | 109098   | 2926      | 34031            | 17165           |
| 0             | 69595        | 3118     | 14603    | 0         | 40137            | 12583           |
| 3282          | 54732        | 0        | 20569    | 0         | 0                | 0               |
| 1297          | 51032        | 23624    | 66836    | 0         | 27448            | 6591            |
| 1830          | 54724        | 1866     | 17020    | 0         | 18362            | 7063            |
| 1752          | 13407        | 0        | 7574     | 0         | 4957             | 6202            |
| 0             | 45709        | 0        | 17823    | 0         | 14497            | 0               |
| 0             | 39743        | 1156     | 19666    | 0         | 24840            | 5771            |
| 0             | 10813        | 0        | 7342     | 0         | 8035             | 0               |
| 570           | 58700        | 1054     | 11713    | 0         | 25591            | 7094            |
| 0             | 34739        | 917      | 13152    | 0         | 14252            | 2065            |
| 0             | 29308        | 0        | 10057    | 0         | 10921            | 2298            |
| 0             | 37438        | 5728     | 23742    | 0         | 11359            | 3218            |
| 0             | 22697        | 5017     | 8392     | 0         | 6254             | 3570            |
| 0             | 46203        | 0        | 18368    | 0         | 12946            | 4597            |
| 0             | 18043        | 6827     | 25210    | 0         | 22698            | 7837            |
| 2281          | 44605        | 1088     | 18545    | 0         | 27046            | 10975           |

| A-Raf S299 | Aurora A (T288)/B (T232)/C (T198) | Bad S112 | Bad S136 | Bad S155 | Bcl2 S70 | Bcl2 T56 |
|------------|-----------------------------------|----------|----------|----------|----------|----------|
| 42617      | 45936                             | 22471    | 15694    | 15749    | 12358    | 3333     |
| 21201      | 60488                             | 21841    | 22144    | 17829    | 10143    | 3482     |
| 27904      | 39348                             | 13515    | 10957    | 13866    | 7255     | 0        |
| 19330      | 71682                             | 35423    | 16541    | 22362    | 23863    | 5176     |
| 29900      | 29734                             | 14487    | 15340    | 9799     | 4952     | 0        |
| 35954      | 51793                             | 31573    | 19822    | 14080    | 15162    | 4039     |
| 14638      | 52788                             | 16163    | 16656    | 16401    | 5693     | 0        |
| 10107      | 22811                             | 16557    | 8217     | 12041    | 6384     | 0        |
| 17429      | 50262                             | 10214    | 8485     | 8951     | 10348    | 2387     |
| 15868      | 31257                             | 22137    | 11826    | 11243    | 7354     | 4925     |
| 17505      | 54724                             | 16490    | 21227    | 14502    | 12570    | 3604     |
| 13762      | 59278                             | 29437    | 18709    | 24835    | 6806     | 0        |
| 14914      | 48060                             | 22900    | 52314    | 22406    | 15271    | 0        |
| 7023       | 37421                             | 15879    | 31417    | 10405    | 8027     | 0        |
| 10275      | 39144                             | 30340    | 18724    | 24230    | 10916    | 0        |
| 10000      | 56107                             | 17296    | 24466    | 23996    | 9173     | 0        |
| 20528      | 24960                             | 25086    | 11221    | 17124    | 8865     | 0        |
| 8981       | 44579                             | 18742    | 22584    | 14314    | 16498    | 5093     |
| 7853       | 35786                             | 18372    | 9543     | 9280     | 16557    | 5309     |
| 9947       | 84137                             | 17633    | 22697    | 22925    | 9191     | 3069     |
| 9852       | 40341                             | 28854    | 15381    | 17370    | 34201    | 8951     |
| 13339      | 37610                             | 35078    | 12663    | 10431    | 7907     | 1541     |
| 21950      | 106938                            | 39348    | 24387    | 21354    | 13141    | 3947     |
| 10764      | 38951                             | 18611    | 16554    | 14669    | 7066     | 2461     |
| 33539      | 21677                             | 23156    | 18793    | 16840    | 7403     | 0        |
| 12817      | 79619                             | 33713    | 23520    | 37999    | 10327    | 3332     |
| 7194       | 90219                             | 22226    | 28142    | 17893    | 11396    | 0        |
| 9036       | 29739                             | 10012    | 23041    | 8911     | 10878    | 2223     |
| 18399      | 59576                             | 16232    | 13169    | 14092    | 4923     | 0        |
| 14415      | 57816                             | 15077    | 18780    | 15802    | 4813     | 0        |
| 5578       | 34373                             | 7327     | 5429     | 9915     | 4675     | 0        |
| 7160       | 38755                             | 25759    | 12645    | 18252    | 14221    | 0        |
| 12518      | 30339                             | 26403    | 20910    | 22708    | 4527     | 0        |
| 10641      | 11290                             | 22607    | 12488    | 20661    | 9127     | 0        |
| 28855      | 52575                             | 18646    | 17388    | 13240    | 3362     | 0        |
| 7657       | 27585                             | 14243    | 7983     | 12696    | 2897     | 0        |
| 8177       | 45707                             | 17855    | 18546    | 20141    | 3587     | 0        |
| 18081      | 17563                             | 10489    | 10405    | 11093    | 3902     | 0        |
| 9893       | 40337                             | 16925    | 13802    | 18658    | 13155    | 0        |
| 12247      | 26108                             | 21195    | 15662    | 22248    | 7112     | 0        |
| 13753      | 32049                             | 25978    | 12607    | 20723    | 5159     | 0        |
| 10455      | 69218                             | 22811    | 22811    | 17971    | 15796    | 1604     |

| Beclin 1 | B-Raf S445 | c-Abl T735 | c-Abl Y245 | cleaved Caspase 3 D175 | cleaved Caspase 7 D198 |
|----------|------------|------------|------------|------------------------|------------------------|
| 31417    | 20391      | 34030      | 1883       | 6438                   | 1145                   |
| 28714    | 18487      | 46632      | 4608       | 14025                  | 1681                   |
| 28001    | 9500       | 11345      | 154        | 4252                   | 779                    |
| 70295    | 85858      | 94373      | 1264       | 6304                   | 2928                   |
| 22473    | 9932       | 42193      | 1438       | 10148                  | 2935                   |
| 47336    | 15679      | 46398      | 3342       | 9855                   | 2928                   |
| 30495    | 65226      | 19713      | 1581       | 5728                   | 966                    |
| 26909    | 11784      | 17714      | 2472       | 7578                   | 1219                   |
| 19501    | 13357      | 33360      | 1360       | 9730                   | 1610                   |
| 31105    | 11639      | 17229      | 1027       | 7808                   | 1906                   |
| 31895    | 26529      | 22802      | 0          | 13962                  | 2556                   |
| 22702    | 15875      | 22587      | 0          | 7903                   | 1056                   |
| 59278    | 27722      | 31257      | 2702       | 6542                   | 1630                   |
| 47099    | 16220      | 24005      | 2961       | 6292                   | 1641                   |
| 38561    | 20262      | 24224      | 2003       | 7308                   | 2154                   |
| 65513    | 28567      | 29594      | 1708       | 17185                  | 1949                   |
| 33702    | 14248      | 23880      | 2936       | 6847                   | 961                    |
| 35249    | 38980      | 15082      | 1503       | 7942                   | 2012                   |
| 23157    | 11475      | 15775      | 2049       | 8314                   | 1239                   |
| 21593    | 36157      | 52076      | 1818       | 5852                   | 2252                   |
| 28014    | 13801      | 24258      | 2163       | 3960                   | 881                    |
| 46869    | 14982      | 25086      | 2488       | 8987                   | 1966                   |
| 36968    | 51278      | 108018     | 3375       | 7696                   | 1741                   |
| 28719    | 29150      | 32371      | 2118       | 6183                   | 2013                   |
| 29588    | 18866      | 25368      | 2677       | 7928                   | 1113                   |
| 21956    | 22473      | 87117      | 3520       | 7506                   | 634                    |
| 34892    | 21678      | 34893      | 2049       | 7805                   | 3228                   |
| 43935    | 21711      | 24714      | 866        | 3433                   | 1091                   |
| 35242    | 16798      | 47811      | 2304       | 7480                   | 1299                   |
| 39735    | 23861      | 20530      | 1586       | 10760                  | 1667                   |
| 45484    | 10214      | 9615       | 1306       | 17671                  | 4863                   |
| 28151    | 37621      | 16626      | 904        | 3317                   | 571                    |
| 36135    | 26657      | 17461      | 2164       | 3181                   | 384                    |
| 22930    | 55001      | 10509      | 0          | 4761                   | 632                    |
| 30952    | 28150      | 17303      | 1615       | 9079                   | 1220                   |
| 22587    | 12552      | 40263      | 2671       | 7533                   | 955                    |
| 29594    | 10422      | 12668      | 1080       | 6446                   | 1047                   |
| 27452    | 7848       | 18106      | 1913       | 9434                   | 1107                   |
| 29146    | 12114      | 12358      | 3221       | 8648                   | 855                    |
| 30644    | 22749      | 11843      | 1361       | 5306                   | 702                    |
| 33867    | 16497      | 13720      | 2765       | 9164                   | 828                    |
| 28007    | 41390      | 42895      | 3549       | 8357                   | 1539                   |

| cleaved Caspase 9 D315 | cleaved Caspase 9 D330 | total ErbB2/HER | Chk1 S345 | Chk2 S33/35 | c-KIT Y719 |
|------------------------|------------------------|-----------------|-----------|-------------|------------|
| 5311                   | 12290                  | 103292          | 8172      | 7751        | 21677      |
| 7848                   | 6950                   | 923             | 5935      | 3443        | 20691      |
| 2798                   | 4054                   | 20054           | 3012      | 4709        | 19429      |
| 5257                   | 22249                  | 4222            | 14159     | 15546       | 25210      |
| 4979                   | 8748                   | 99242           | 3623      | 3274        | 20202      |
| 5804                   | 19333                  | 129321          | 7366      | 15757       | 39735      |
| 3189                   | 10058                  | 1206            | 4847      | 6608        | 19575      |
| 6308                   | 5533                   | 1011            | 1863      | 3667        | 14847      |
| 3476                   | 12862                  | 633             | 5592      | 7411        | 14541      |
| 6284                   | 8678                   | 1025            | 4271      | 5639        | 17457      |
| 6487                   | 26108                  | 1664            | 7899      | 6390        | 25336      |
| 6634                   | 6826                   | 0               | 4540      | 5141        | 17051      |
| 6042                   | 25210                  | 790             | 7543      | 3215        | 40135      |
| 7850                   | 14567                  | 1456            | 3128      | 5258        | 22115      |
| 9466                   | 17536                  | 621             | 4189      | 2127        | 22471      |
| 6591                   | 10344                  | 727             | 10706     | 2492        | 28001      |
| 8008                   | 6584                   | 628             | 5290      | 0           | 28999      |
| 6190                   | 18034                  | 0               | 10348     | 10123       | 20150      |
| 5298                   | 9429                   | 0               | 3860      | 9224        | 19673      |
| 5908                   | 15796                  | 939             | 6549      | 5508        | 17807      |
| 6578                   | 13506                  | 599             | 3236      | 9972        | 32862      |
| 6270                   | 12016                  | 1187            | 4711      | 3843        | 21365      |
| 6888                   | 9182                   | 1219            | 8296      | 10722       | 30486      |
| 5405                   | 7934                   | 1075            | 6595      | 2034        | 22811      |
| 6333                   | 8840                   | 1763            | 3868      | 4239        | 19303      |
| 9779                   | 10846                  | 0               | 3691      | 3284        | 24836      |
| 8987                   | 21062                  | 623             | 4249      | 4273        | 33025      |
| 2996                   | 11048                  | 288             | 5044      | 8375        | 21451      |
| 8160                   | 10208                  | 752             | 1295      | 996         | 23041      |
| 5727                   | 10949                  | 0               | 2372      | 0           | 17810      |
| 4971                   | 9137                   | 0               | 2990      | 643         | 18789      |
| 3823                   | 13017                  | 0               | 4704      | 2105        | 28567      |
| 8149                   | 7503                   | 680             | 0         | 0           | 18017      |
| 2372                   | 3732                   | 0               | 6705      | 2905        | 18659      |
| 8701                   | 7526                   | 0               | 3845      | 3182        | 15812      |
| 9723                   | 6933                   | 518             | 4073      | 3189        | 16433      |
| 7147                   | 6348                   | 0               | 592       | 2990        | 21569      |
| 6926                   | 6871                   | 0               | 2524      | 1196        | 13836      |
| 16926                  | 12633                  | 0               | 699       | 1837        | 21648      |
| 7641                   | 4425                   | 0               | 0         | 6133        | 16691      |
| 9193                   | 5991                   | 0               | 2702      | 2806        | 16123      |
| 6712                   | 23390                  | 698             | 16664     | 12357       | 35242      |

| Cofilin S3 | cPLA2 (S505) | CREB S133 | Crkl Y221 | Cyclin B1 | Cyclin D1 | Cyclin E |
|------------|--------------|-----------|-----------|-----------|-----------|----------|
| 1189       | 12271        | 12747     | 10293     | 6560      | 1017      | 15924    |
| 7013       | 7419         | 21547     | 8398      | 11879     | 0         | 15576    |
| 0          | 9760         | 20171     | 4517      | 5693      | 0         | 6797     |
| 11597      | 14437        | 34202     | 1521      | 22194     | 1134      | 34718    |
| 11992      | 11311        | 8571      | 5077      | 9563      | 364       | 16360    |
| 24344      | 53907        | 27310     | 12217     | 26769     | 1750      | 45937    |
| 31890      | 7689         | 12221     | 2076      | 9916      | 0         | 24632    |
| 1607       | 4699         | 12855     | 4161      | 7569      | 802       | 13469    |
| 19663      | 7440         | 9089      | 1890      | 26108     | 0         | 11402    |
| 7634       | 3268         | 7767      | 5437      | 11903     | 1138      | 12532    |
| 0          | 5162         | 13531     | 8128      | 7261      | 313       | 15748    |
| 0          | 6849         | 18638     | 7296      | 23157     | 0         | 7398     |
| 1496       | 14207        | 56526     | 6251      | 989       | 0         | 26372    |
| 5761       | 6079         | 21015     | 6864      | 5601      | 0         | 13214    |
| 2856       | 10851        | 32706     | 5311      | 5096      | 878       | 15067    |
| 4423       | 13780        | 32861     | 6905      | 18700     | 0         | 12664    |
| 6533       | 11193        | 21611     | 11718     | 2617      | 7476      | 8193     |
| 3616       | 14921        | 27722     | 2567      | 24712     | 1674      | 15012    |
| 4955       | 4652         | 17970     | 3320      | 8780      | 683       | 7744     |
| 4959       | 13321        | 50514     | 2601      | 11709     | 5022      | 14802    |
| 13434      | 6954         | 50277     | 7817      | 8675      | 1360      | 11172    |
| 7612       | 6909         | 25086     | 6116      | 4085      | 848       | 14052    |
| 13333      | 11511        | 24348     | 3978      | 6659      | 748       | 25466    |
| 3111       | 11266        | 29594     | 3027      | 6892      | 503       | 21290    |
| 15757      | 13011        | 34892     | 11391     | 19035     | 664       | 11633    |
| 39735      | 11044        | 23160     | 7603      | 53907     | 0         | 19839    |
| 9023       | 11339        | 48594     | 4308      | 8871      | 0         | 15407    |
| 7609       | 8255         | 33028     | 2589      | 7508      | 1046      | 8815     |
| 5939       | 8765         | 25466     | 5614      | 5783      | 1827      | 12843    |
| 10476      | 7263         | 36361     | 6066      | 9645      | 694       | 10717    |
| 0          | 4060         | 2015      | 9073      | 4844      | 979       | 11115    |
| 2078       | 108555       | 21019     | 3327      | 0         | 0         | 7782     |
| 0          | 5840         | 31914     | 13307     | 3795      | 0         | 8443     |
| 0          | 4130         | 13793     | 604       | 106       | 0         | 3876     |
| 816        | 9629         | 27862     | 7632      | 7212      | 0         | 7856     |
| 14898      | 15553        | 11234     | 9024      | 5460      | 2968      | 6675     |
| 0          | 6792         | 23272     | 3926      | 10334     | 1551      | 8350     |
| 6905       | 2101         | 11971     | 5315      | 11252     | 778       | 8115     |
| 14358      | 6264         | 18169     | 4837      | 33028     | 830       | 7790     |
| 0          | 4687         | 20126     | 3354      | 5387      | 0         | 4599     |
| 1629       | 5295         | 13040     | 6393      | 30056     | 0         | 7972     |
| 15853      | 26635        | 23981     | 3655      | 40946     | 2865      | 35775    |

| EGFR S1046/1047 | EGFR Y1045 | EGFR Y1068 | EGFR Y1148 | EGFR Y1173 | EGFR Y845 | EGFR Y992 |
|-----------------|------------|------------|------------|------------|-----------|-----------|
| 4811            | 4193       | 2233       | 89771      | 47336      | 23625     | 10296     |
| 2539            | 4947       | 2491       | 57530      | 13659      | 15709     | 6867      |
| 3021            | 1626       | 2934       | 51809      | 172011     | 20020     | 8839      |
| 2988            | 2696       | 0          | 109657     | 16196      | 33712     | 6352      |
| 2777            | 2320       | 3404       | 43262      | 236810     | 23047     | 6299      |
| 5630            | 5926       | 1463       | 105347     | 106469     | 28142     | 7590      |
| 2091            | 3507       | 1790       | 44149      | 10400      | 17193     | 2999      |
| 1879            | 3170       | 2248       | 70267      | 12314      | 15306     | 6156      |
| 2092            | 3097       | 1767       | 66171      | 10184      | 16084     | 3917      |
| 2188            | 2582       | 1973       | 59922      | 10453      | 15253     | 9634      |
| 2330            | 2211       | 1941       | 79257      | 27452      | 23983     | 8061      |
| 2007            | 2634       | 1033       | 48953      | 11568      | 17633     | 5033      |
| 2058            | 2717       | 1215       | 66890      | 22026      | 21376     | 4538      |
| 2004            | 2420       | 1914       | 36323      | 23043      | 17301     | 3870      |
| 1930            | 1838       | 1255       | 61096      | 21166      | 18122     | 4228      |
| 1982            | 2388       | 1304       | 52314      | 14874      | 16515     | 5594      |
| 2278            | 2577       | 1694       | 56113      | 17864      | 20660     | 3265      |
| 2163            | 2035       | 1960       | 53403      | 14087      | 21174     | 6059      |
| 2108            | 4119       | 3344       | 50719      | 14531      | 18782     | 11541     |
| 2647            | 1582       | 945        | 67239      | 17715      | 20639     | 5204      |
| 2237            | 4554       | 2516       | 39538      | 13374      | 22576     | 4138      |
| 1815            | 2588       | 1669       | 72086      | 23161      | 17828     | 4873      |
| 2183            | 3952       | 2224       | 69914      | 27585      | 18892     | 5347      |
| 1714            | 3007       | 1953       | 55271      | 20216      | 15041     | 4736      |
| 1295            | 1613       | 1866       | 45040      | 17312      | 17510     | 2894      |
| 1850            | 3017       | 2330       | 65526      | 14460      | 17483     | 5613      |
| 1396            | 2832       | 1325       | 40137      | 11731      | 17802     | 2825      |
| 2479            | 3963       | 645        | 43701      | 8760       | 22698     | 5094      |
| 1506            | 1638       | 731        | 43696      | 14198      | 16698     | 2696      |
| 1464            | 1285       | 631        | 51278      | 11676      | 14780     | 2310      |
| 1154            | 1796       | 1003       | 41570      | 12595      | 13056     | 3374      |
| 1452            | 2072       | 0          | 46640      | 16390      | 20457     | 3140      |
| 3627            | 2401       | 1783       | 56705      | 18373      | 19776     | 2403      |
| 4813            | 3801       | 0          | 27612      | 13020      | 13551     | 4969      |
| 2989            | 1559       | 1936       | 39738      | 17067      | 17589     | 2579      |
| 2554            | 1983       | 853        | 29334      | 11495      | 12922     | 4577      |
| 2876            | 2965       | 1232       | 49768      | 10767      | 17806     | 4012      |
| 2373            | 1214       | 1004       | 44149      | 13070      | 13409     | 2079      |
| 4192            | 1471       | 1192       | 36189      | 10128      | 11970     | 3678      |
| 6822            | 2833       | 3056       | 49513      | 13286      | 13810     | 5590      |
| 4766            | 1934       | 2231       | 103860     | 17168      | 13823     | 4701      |
| 1785            | 1706       | 1530       | 47137      | 11301      | 27038     | 3824      |

| eIF4E S209 | eIF4G S1108 | Elk-1 S383 | eNOS S113 | ErbB2 Y1248 | ErbB3 Y1197 | ErbB3 Y1289 |
|------------|-------------|------------|-----------|-------------|-------------|-------------|
| 9888       | 32068       | 9890       | 1284      | 51545       | 24466       | 34216       |
| 4104       | 31991       | 8672       | 1622      | 806         | 5707        | 3103        |
| 12078      | 15750       | 10012      | 723       | 53424       | 25853       | 20476       |
| 6964       | 67172       | 14344      | 879       | 3133        | 6698        | 4792        |
| 7270       | 5088        | 7941       | 948       | 117032      | 18316       | 27585       |
| 14523      | 8195        | 37613      | 1311      | 74281       | 55282       | 81650       |
| 4284       | 34791       | 11220      | 1484      | 953         | 5062        | 3400        |
| 2785       | 8185        | 4905       | 1053      | 617         | 2838        | 2715        |
| 3801       | 15322       | 9585       | 1431      | 0           | 3636        | 1954        |
| 3758       | 8088        | 3684       | 927       | 993         | 3678        | 2163        |
| 5237       | 11693       | 6632       | 1388      | 1493        | 6302        | 6894        |
| 8558       | 23021       | 6665       | 1256      | 601         | 3049        | 2594        |
| 8116       | 14569       | 12205      | 4503      | 999         | 8097        | 4586        |
| 10931      | 16590       | 8521       | 1346      | 2362        | 5099        | 4765        |
| 15398      | 11882       | 12567      | 1797      | 830         | 6089        | 5264        |
| 9692       | 62944       | 7561       | 1217      | 755         | 6281        | 2361        |
| 11170      | 7082        | 11795      | 4186      | 982         | 3853        | 3337        |
| 5413       | 13149       | 5832       | 1120      | 0           | 4785        | 2454        |
| 3820       | 4619        | 7487       | 1285      | 0           | 3260        | 2902        |
| 7091       | 28003       | 10184      | 1367      | 1302        | 5900        | 6626        |
| 4414       | 6099        | 14092      | 1019      | 0           | 5688        | 3716        |
| 5780       | 14150       | 7496       | 1091      | 2186        | 6981        | 5032        |
| 5608       | 17219       | 9956       | 1556      | 1122        | 5375        | 3365        |
| 4078       | 11882       | 7590       | 1120      | 647         | 4097        | 2351        |
| 5525       | 45964       | 11084      | 1797      | 2250        | 4999        | 3768        |
| 6245       | 60446       | 7527       | 1611      | 0           | 4615        | 3462        |
| 8338       | 23181       | 10588      | 1047      | 0           | 6602        | 5310        |
| 5338       | 17566       | 10539      | 1544      | 0           | 4199        | 3050        |
| 6273       | 42617       | 10982      | 2301      | 923         | 8984        | 7678        |
| 9265       | 68186       | 9308       | 1283      | 0           | 4413        | 3022        |
| 4571       | 1366        | 3587       | 1380      | 0           | 3918        | 2013        |
| 8770       | 37489       | 8057       | 22360     | 675         | 5103        | 4641        |
| 7016       | 53939       | 13760      | 2495      | 2027        | 4645        | 5482        |
| 8430       | 0           | 6960       | 0         | 703         | 3609        | 4308        |
| 7529       | 11326       | 16424      | 1851      | 861         | 2872        | 3186        |
| 5711       | 16909       | 11009      | 1169      | 673         | 2486        | 3284        |
| 7155       | 11848       | 18098      | 1064      | 0           | 3573        | 1354        |
| 5037       | 7430        | 9644       | 1246      | 0           | 3098        | 2128        |
| 6954       | 16471       | 19546      | 1645      | 0           | 3724        | 2135        |
| 8393       | 5457        | 9742       | 738       | 522         | 3669        | 1909        |
| 6773       | 9003        | 11698      | 1479      | 806         | 3486        | 4112        |
| 6722       | 42269       | 11590      | 89771     | 0           | 8640        | 8946        |



| ErbB3/HER3 | ErbB4/HER4 | ERK 1/2 T202/Y204 | total Estrogen Receptor alpha |
|------------|------------|-------------------|-------------------------------|
| 18097      | 17391      | 48806             | 17206                         |
| 7073       | 10063      | 22811             | 1628                          |
| 17289      | 9860       | 96766             | 0                             |
| 41983      | 28433      | 78449             | 72767                         |
| 13870      | 9930       | 8319              | 0                             |
| 43047      | 15014      | 80017             | 0                             |
| 6965       | 9409       | 103777            | 0                             |
| 14458      | 8055       | 125549            | 21344                         |
| 3250       | 8472       | 50262             | 10174                         |
| 12361      | 11473      | 8016              | 0                             |
| 8778       | 17481      | 14828             | 0                             |
| 3355       | 6874       | 26255             | 0                             |
| 20161      | 14582      | 55282             | 0                             |
| 6433       | 12548      | 5484              | 0                             |
| 9918       | 12360      | 17397             | 0                             |
| 6027       | 11583      | 56957             | 0                             |
| 11508      | 6802       | 68872             | 3289                          |
| 7581       | 12341      | 12277             | 0                             |
| 3822       | 13046      | 14691             | 0                             |
| 20300      | 12384      | 68927             | 0                             |
| 5188       | 8567       | 71686             | 0                             |
| 10679      | 10361      | 88437             | 0                             |
| 70263      | 12944      | 31585             | 2113                          |
| 19772      | 9775       | 69218             | 0                             |
| 23862      | 7499       | 108018            | 0                             |
| 4830       | 9220       | 24589             | 1194                          |
| 5509       | 10922      | 9325              | 0                             |
| 6645       | 11304      | 45254             | 0                             |
| 15375      | 9576       | 73189             | 0                             |
| 2192       | 9338       | 49023             | 0                             |
| 6629       | 7382       | 544               | 0                             |
| 12534      | 9202       | 103798            | 0                             |
| 9681       | 7343       | 65881             | 3672                          |
| 5419       | 6060       | 5679              | 0                             |
| 4284       | 7823       | 94845             | 0                             |
| 5774       | 7915       | 15149             | 0                             |
| 7021       | 8051       | 21775             | 0                             |
| 2728       | 9240       | 81228             | 1271                          |
| 18444      | 9332       | 11796             | 714                           |
| 6206       | 8076       | 76880             | 0                             |
| 9055       | 9959       | 63960             | 676                           |
| 16503      | 8641       | 9325              | 0                             |

| Estrogen Receptor alpha S118 | FADD S194 | FAK Y397 | FAK Y576/577 | Foxo 1 T24/32 | Foxo S253 |
|------------------------------|-----------|----------|--------------|---------------|-----------|
| 4744                         | 16910     | 0        | 4819         | 25981         | 26637     |
| 3204                         | 52329     | 0        | 1849         | 28567         | 45054     |
| 0                            | 7450      | 0        | 10573        | 16108         | 73498     |
| 6842                         | 44811     | 0        | 1076         | 40948         | 37613     |
| 0                            | 20344     | 0        | 14401        | 25592         | 21142     |
| 3678                         | 96290     | 0        | 34722        | 80081         | 67179     |
| 0                            | 94468     | 0        | 1650         | 32534         | 24711     |
| 1575                         | 6671      | 0        | 2615         | 28283         | 13957     |
| 0                            | 10884     | 0        | 709          | 17635         | 15200     |
| 1629                         | 6692      | 0        | 1401         | 21134         | 9411      |
| 0                            | 3598      | 0        | 1778         | 95350         | 14102     |
| 0                            | 18490     | 0        | 3065         | 35612         | 20131     |
| 0                            | 52575     | 0        | 3566         | 42651         | 50262     |
| 0                            | 21057     | 0        | 3383         | 33867         | 29882     |
| 0                            | 29882     | 0        | 3855         | 61087         | 40742     |
| 0                            | 30333     | 0        | 2103         | 47108         | 57240     |
| 0                            | 7639      | 0        | 2986         | 32547         | 37079     |
| 0                            | 8880      | 0        | 2295         | 16124         | 35612     |
| 0                            | 5607      | 0        | 1462         | 11956         | 16716     |
| 2216                         | 21744     | 0        | 1448         | 15489         | 27728     |
| 6343                         | 25720     | 0        | 2962         | 69225         | 16473     |
| 1999                         | 11427     | 0        | 4602         | 19517         | 33357     |
| 2072                         | 19092     | 0        | 4494         | 15337         | 46630     |
| 1086                         | 56957     | 0        | 2892         | 13076         | 30946     |
| 0                            | 15805     | 0        | 4825         | 32696         | 71347     |
| 2826                         | 27175     | 0        | 2045         | 70969         | 48782     |
| 0                            | 37991     | 0        | 1820         | 95379         | 37049     |
| 0                            | 18573     | 0        | 0            | 12952         | 21408     |
| 2696                         | 8893      | 0        | 3667         | 49536         | 31571     |
| 0                            | 7045      | 0        | 2120         | 16798         | 23624     |
| 0                            | 0         | 0        | 3148         | 3310          | 4696      |
| 0                            | 32862     | 0        | 0            | 22248         | 64296     |
| 0                            | 9435      | 0        | 7040         | 26519         | 57246     |
| 0                            | 2767      | 0        | 0            | 15306         | 57850     |
| 0                            | 6615      | 0        | 3982         | 15757         | 33525     |
| 0                            | 16231     | 0        | 3312         | 20961         | 24836     |
| 0                            | 8958      | 0        | 1642         | 10525         | 23988     |
| 1178                         | 3279      | 0        | 2196         | 25994         | 18537     |
| 0                            | 26769     | 0        | 2908         | 56954         | 21550     |
| 0                            | 6529      | 0        | 3427         | 19479         | 37031     |
| 0                            | 7844      | 0        | 4922         | 29293         | 35775     |
| 3282                         | 60488     | 0        | 2327         | 17054         | 44148     |

| <b>Foxo S256</b> | <b>GSK3 alpha-beta S21/9</b> | <b>Histone H3 S10</b> | <b>IGF1 Rec Y1131-Insulin Rec Y1146</b> |
|------------------|------------------------------|-----------------------|-----------------------------------------|
| 13762            | 24726                        | 2351                  | 859                                     |
| 18648            | 21764                        | 2300                  | 0                                       |
| 26903            | 42046                        | 1210                  | 545                                     |
| 19854            | 59636                        | 3003                  | 0                                       |
| 10700            | 15197                        | 994                   | 748                                     |
| 28145            | 60476                        | 5424                  | 1313                                    |
| 13168            | 48306                        | 1327                  | 0                                       |
| 13664            | 20020                        | 1542                  | 519                                     |
| 8791             | 20920                        | 1821                  | 0                                       |
| 8239             | 44135                        | 1404                  | 0                                       |
| 10493            | 24473                        | 4875                  | 634                                     |
| 14397            | 34892                        | 1496                  | 0                                       |
| 24222            | 22248                        | 2345                  | 0                                       |
| 16515            | 19342                        | 1779                  | 0                                       |
| 18695            | 20507                        | 2594                  | 0                                       |
| 26903            | 54601                        | 2453                  | 0                                       |
| 15964            | 13500                        | 968                   | 784                                     |
| 16020            | 30339                        | 2536                  | 0                                       |
| 10205            | 10889                        | 3324                  | 0                                       |
| 11419            | 25336                        | 1992                  | 0                                       |
| 13562            | 23757                        | 3196                  | 767                                     |
| 15883            | 22248                        | 1682                  | 0                                       |
| 17214            | 26635                        | 2410                  | 626                                     |
| 11379            | 12289                        | 2022                  | 0                                       |
| 30031            | 45936                        | 1678                  | 0                                       |
| 25978            | 82044                        | 3493                  | 0                                       |
| 22248            | 28999                        | 2066                  | 0                                       |
| 9776             | 9365                         | 1618                  | 786                                     |
| 17137            | 32860                        | 1653                  | 554                                     |
| 12753            | 17171                        | 1393                  | 0                                       |
| 5926             | 2137                         | 1527                  | 0                                       |
| 24465            | 35286                        | 1401                  | 0                                       |
| 22031            | 17117                        | 1061                  | 0                                       |
| 22930            | 9242                         | 864                   | 0                                       |
| 17589            | 31102                        | 1398                  | 0                                       |
| 13975            | 12735                        | 1264                  | 532                                     |
| 13814            | 6954                         | 1513                  | 0                                       |
| 13509            | 17834                        | 1095                  | 0                                       |
| 12967            | 14095                        | 2815                  | 0                                       |
| 18206            | 10153                        | 1513                  | 0                                       |
| 16706            | 12868                        | 1906                  | 0                                       |
| 18057            | 19374                        | 5257                  | 650                                     |

| <b>IGF-1R Y1135/36-IR Y1150/51</b> | <b>Ikappa B alpha (S32/36)(5A5)</b> | <b>IRS-1 S612</b> | <b>Jak1 Y1022/1023</b> |
|------------------------------------|-------------------------------------|-------------------|------------------------|
| 44135                              | 20003                               | 6789              | 5973                   |
| 22471                              | 14071                               | 4241              | 4296                   |
| 9276                               | 4576                                | 0                 | 7439                   |
| 82952                              | 12646                               | 26242             | 5336                   |
| 31895                              | 10000                               | 2485              | 6871                   |
| 38369                              | 13644                               | 12416             | 14641                  |
| 16205                              | 7891                                | 3737              | 3851                   |
| 16459                              | 10369                               | 3436              | 4434                   |
| 24632                              | 8367                                | 7428              | 4108                   |
| 32371                              | 8448                                | 8157              | 3443                   |
| 32874                              | 11087                               | 5003              | 7686                   |
| 16848                              | 9936                                | 3356              | 5151                   |
| 12435                              | 8626                                | 5815              | 6796                   |
| 11098                              | 8827                                | 3269              | 5341                   |
| 12781                              | 9848                                | 9211              | 6330                   |
| 11749                              | 8052                                | 3802              | 8153                   |
| 11787                              | 6562                                | 13779             | 4344                   |
| 15586                              | 7701                                | 6817              | 4297                   |
| 18686                              | 7752                                | 5066              | 4100                   |
| 18883                              | 9019                                | 5668              | 4536                   |
| 38179                              | 13708                               | 9749              | 3231                   |
| 18253                              | 14381                               | 5202              | 4918                   |
| 26503                              | 13773                               | 4481              | 5514                   |
| 13807                              | 10928                               | 8357              | 3656                   |
| 20583                              | 12492                               | 8654              | 4113                   |
| 23272                              | 15144                               | 5707              | 4508                   |
| 12754                              | 9009                                | 6968              | 4016                   |
| 25186                              | 6367                                | 6537              | 4615                   |
| 11108                              | 8666                                | 4107              | 3994                   |
| 11606                              | 8159                                | 3199              | 3390                   |
| 7294                               | 8409                                | 2135              | 4820                   |
| 10822                              | 4078                                | 3798              | 4590                   |
| 8498                               | 7868                                | 7429              | 3241                   |
| 4746                               | 0                                   | 0                 | 2813                   |
| 12924                              | 6599                                | 3546              | 3143                   |
| 10820                              | 5778                                | 4374              | 2509                   |
| 11238                              | 5246                                | 2841              | 2901                   |
| 13741                              | 4379                                | 3344              | 3221                   |
| 10092                              | 5465                                | 4867              | 3713                   |
| 9159                               | 2994                                | 3558              | 3870                   |
| 13569                              | 56107                               | 3732              | 3731                   |
| 39935                              | 13495                               | 10320             | 4682                   |

| Jak2 Y1007/1008 | LIMK1 T508-LIMK2 T505 | LKB1 S334 | MARCKS S152/156 | MEK1/2 S217/221 |
|-----------------|-----------------------|-----------|-----------------|-----------------|
| 38755           | 15812                 | 12335     | 21155           | 43917           |
| 16799           | 24222                 | 7064      | 70969           | 44140           |
| 22555           | 11285                 | 7674      | 40742           | 46426           |
| 47572           | 25084                 | 13336     | 8268            | 37258           |
| 21983           | 13919                 | 7567      | 10819           | 17674           |
| 41773           | 26905                 | 17672     | 13753           | 60476           |
| 18144           | 22476                 | 6784      | 20449           | 24101           |
| 11345           | 4967                  | 5338      | 13260           | 25591           |
| 38369           | 15306                 | 4012      | 6746            | 13301           |
| 30946           | 8600                  | 10558     | 12582           | 14523           |
| 44579           | 10802                 | 14483     | 27175           | 17958           |
| 19712           | 7685                  | 8201      | 23166           | 15907           |
| 27448           | 29882                 | 21184     | 24588           | 48543           |
| 20996           | 12113                 | 13787     | 21153           | 19233           |
| 21443           | 18921                 | 15852     | 39735           | 34899           |
| 25213           | 19951                 | 11726     | 82044           | 64874           |
| 27313           | 25210                 | 11132     | 32559           | 27367           |
| 43914           | 11015                 | 11929     | 13033           | 17694           |
| 34031           | 8426                  | 10665     | 18171           | 18527           |
| 24101           | 25848                 | 7632      | 46864           | 38408           |
| 21258           | 8871                  | 17659     | 17035           | 20229           |
| 19832           | 17095                 | 11646     | 32049           | 39144           |
| 33192           | 25848                 | 13575     | 32068           | 39935           |
| 17606           | 13320                 | 9549      | 16564           | 31263           |
| 17292           | 20192                 | 11867     | 38949           | 46632           |
| 18921           | 14736                 | 12926     | 32696           | 33197           |
| 20911           | 15869                 | 14605     | 49023           | 18108           |
| 29733           | 13267                 | 4622      | 17659           | 22031           |
| 20314           | 16229                 | 12050     | 33190           | 25986           |
| 17865           | 14003                 | 11499     | 86251           | 69225           |
| 20807           | 4825                  | 8334      | 3858            | 6190            |
| 20563           | 17554                 | 14550     | 50011           | 45941           |
| 20935           | 16606                 | 18219     | 41565           | 20220           |
| 19103           | 8756                  | 12161     | 24344           | 13102           |
| 21748           | 15033                 | 13199     | 42195           | 56140           |
| 17920           | 9775                  | 9917      | 20518           | 13549           |
| 21791           | 9552                  | 11212     | 28710           | 31914           |
| 16876           | 10245                 | 9807      | 73498           | 36323           |
| 21605           | 9242                  | 11496     | 26905           | 22249           |
| 22069           | 12414                 | 9947      | 99708           | 15725           |
| 19805           | 11277                 | 11714     | 23157           | 22707           |
| 22194           | 21090                 | 13377     | 11739           | 47435           |

| MSK1 S360 | Mst1 T183-Mst2 T180 | mTOR S2448 | mTOR S2481 | Nanog | NF-kB p65 S536 | p27 T187 |
|-----------|---------------------|------------|------------|-------|----------------|----------|
| 6254      | 39542               | 23185      | 15123      | 12532 | 10956          | 14804    |
| 6419      | 36680               | 22360      | 15215      | 9491  | 10608          | 15675    |
| 4485      | 26903               | 12305      | 10404      | 10079 | 15004          | 10284    |
| 11874     | 33702               | 29746      | 21005      | 23041 | 8439           | 19766    |
| 7144      | 19911               | 6625       | 12259      | 11221 | 4024           | 12595    |
| 11199     | 18420               | 23509      | 19016      | 23861 | 53376          | 41565    |
| 7044      | 21036               | 24589      | 16908      | 10548 | 2327           | 14730    |
| 17606     | 24588               | 10966      | 11251      | 6665  | 3805           | 11215    |
| 2805      | 15279               | 5147       | 10172      | 20952 | 2428           | 24466    |
| 6884      | 41987               | 10647      | 14991      | 14699 | 7299           | 8418     |
| 6936      | 33360               | 8218       | 18960      | 16623 | 3971           | 17175    |
| 6277      | 33025               | 8008       | 13242      | 8938  | 2626           | 14048    |
| 13843     | 36498               | 16012      | 13478      | 17578 | 18978          | 20806    |
| 5514      | 27447               | 13309      | 16877      | 11186 | 9858           | 17704    |
| 9682      | 32533               | 13258      | 15391      | 11679 | 15788          | 16689    |
| 7159      | 32860               | 11914      | 14080      | 11013 | 10159          | 25848    |
| 5093      | 31740               | 7398       | 9469       | 10143 | 26810          | 11864    |
| 7288      | 27729               | 10520      | 13387      | 17061 | 7057           | 12134    |
| 7369      | 31730               | 7931       | 15627      | 10128 | 5068           | 8767     |
| 4944      | 23984               | 28719      | 13191      | 11048 | 35078          | 24962    |
| 13367     | 30333               | 4581       | 10041      | 7868  | 5438           | 14101    |
| 9678      | 29437               | 17527      | 15041      | 8006  | 8381           | 12043    |
| 6993      | 25774               | 14003      | 14139      | 13639 | 30182          | 11098    |
| 10615     | 23273               | 10993      | 12979      | 13341 | 4498           | 8364     |
| 9086      | 34544               | 17955      | 14751      | 7892  | 18961          | 14061    |
| 6864      | 37988               | 16989      | 19103      | 11511 | 2504           | 23041    |
| 4333      | 23156               | 10286      | 15102      | 12570 | 5953           | 26909    |
| 2098      | 15327               | 9002       | 13848      | 18667 | 2076           | 10944    |
| 5016      | 23861               | 8540       | 11221      | 9190  | 12457          | 14243    |
| 3868      | 25591               | 9248       | 10706      | 9395  | 8600           | 15207    |
| 4687      | 21862               | 2059       | 6468       | 6869  | 2001           | 10234    |
| 10722     | 25348               | 11534      | 10894      | 11632 | 27186          | 17298    |
| 8464      | 33035               | 11199      | 11881      | 6844  | 13495          | 16994    |
| 2596      | 24473               | 4139       | 6794       | 11929 | 10641          | 6303     |
| 9382      | 36869               | 13711      | 12887      | 7057  | 5869           | 15074    |
| 4331      | 27179               | 7797       | 8435       | 7311  | 10231          | 13903    |
| 7485      | 24840               | 3994       | 8524       | 7998  | 15512          | 13926    |
| 4176      | 22274               | 5943       | 8649       | 6792  | 6589           | 9036     |
| 6668      | 24714               | 9238       | 11725      | 7158  | 6350           | 16318    |
| 5345      | 28573               | 8222       | 8723       | 8718  | 12000          | 10162    |
| 8271      | 26392               | 9048       | 12236      | 6290  | 13240          | 11554    |
| 4483      | 28860               | 28581      | 13481      | 16368 | 21680          | 25090    |

| <b>p38 MAPK T180/Y182</b> | <b>p53</b> | <b>p70 S6K S371</b> | <b>p70 S6K T389</b> | <b>p90 RSK S380</b> |
|---------------------------|------------|---------------------|---------------------|---------------------|
| 21161                     | 17575      | 20799               | 9070                | 7693                |
| 43080                     | 19021      | 15788               | 7701                | 10484               |
| 21635                     | 9421       | 18541               | 23161               | 7610                |
| 14735                     | 22818      | 15279               | 4089                | 7464                |
| 26905                     | 16557      | 8726                | 722                 | 4813                |
| 21505                     | 16615      | 19284               | 6305                | 13529               |
| 30192                     | 8312       | 8602                | 8662                | 7525                |
| 20238                     | 10382      | 8929                | 1668                | 5462                |
| 14636                     | 11430      | 5881                | 4945                | 3833                |
| 12088                     | 18988      | 15144               | 1694                | 3230                |
| 25105                     | 15093      | 16458               | 2292                | 5676                |
| 26637                     | 19556      | 11873               | 2728                | 12383               |
| 38561                     | 7901       | 7817                | 1897                | 26239               |
| 17855                     | 11664      | 7458                | 1619                | 4122                |
| 65187                     | 14091      | 13293               | 1660                | 19516               |
| 43045                     | 10642      | 13023               | 4322                | 21851               |
| 22443                     | 10884      | 8774                | 1023                | 14450               |
| 20074                     | 14670      | 12193               | 2487                | 4759                |
| 20461                     | 17502      | 14424               | 2513                | 10033               |
| 21056                     | 11487      | 7716                | 6222                | 11007               |
| 32211                     | 21290      | 12927               | 0                   | 15293               |
| 65226                     | 14014      | 12958               | 2016                | 12657               |
| 17443                     | 11659      | 10663               | 1296                | 18279               |
| 12874                     | 9688       | 9303                | 1819                | 14245               |
| 31740                     | 12561      | 18288               | 2770                | 23389               |
| 18507                     | 29293      | 16212               | 7159                | 12094               |
| 58402                     | 9067       | 7234                | 1808                | 9932                |
| 15759                     | 28145      | 9625                | 5870                | 5780                |
| 22925                     | 9935       | 6967                | 2339                | 14073               |
| 38369                     | 12038      | 8321                | 2770                | 10998               |
| 10082                     | 8996       | 8884                | 672                 | 1293                |
| 78851                     | 8616       | 3779                | 2121                | 33192               |
| 63261                     | 10695      | 8897                | 3320                | 15910               |
| 18937                     | 8236       | 5013                | 1658                | 11777               |
| 33867                     | 11724      | 10620               | 2178                | 18616               |
| 29157                     | 10851      | 14287               | 3452                | 5402                |
| 50514                     | 12759      | 7683                | 0                   | 6529                |
| 24960                     | 11092      | 7094                | 785                 | 6088                |
| 15147                     | 43287      | 9253                | 3439                | 4661                |
| 44140                     | 16700      | 7133                | 2202                | 15033               |
| 34202                     | 10868      | 10415               | 1857                | 21972               |
| 18596                     | 14255      | 17998               | 10550               | 29739               |

| PAK1 S199/204-PAK2 S192/197 | PAK1T423/PAK2T402 | cleaved PARP D214 | Paxillin Y118 |
|-----------------------------|-------------------|-------------------|---------------|
| 7187                        | 37421             | 2969              | 3326          |
| 8840                        | 38392             | 13895             | 0             |
| 13096                       | 31102             | 1322              | 899           |
| 4681                        | 60524             | 4813              | 4615          |
| 4501                        | 27585             | 9252              | 2609          |
| 23043                       | 67847             | 36680             | 11784         |
| 5208                        | 26051             | 8181              | 0             |
| 3435                        | 34207             | 1691              | 0             |
| 5357                        | 37423             | 21496             | 5267          |
| 4364                        | 27722             | 6214              | 2218          |
| 11915                       | 43917             | 10588             | 1686          |
| 11726                       | 24835             | 3037              | 0             |
| 12849                       | 38759             | 2670              | 1377          |
| 6100                        | 30031             | 5139              | 1311          |
| 7724                        | 35596             | 2660              | 0             |
| 18097                       | 38195             | 14640             | 0             |
| 10786                       | 28442             | 1315              | 7115          |
| 5121                        | 39767             | 9400              | 3481          |
| 4588                        | 29588             | 4373              | 1968          |
| 19844                       | 45072             | 4893              | 2120          |
| 3973                        | 23866             | 3836              | 3739          |
| 8271                        | 33539             | 622               | 2115          |
| 11165                       | 51278             | 1012              | 3642          |
| 5306                        | 37421             | 3857              | 3465          |
| 9027                        | 25336             | 1937              | 0             |
| 10754                       | 42625             | 2692              | 6739          |
| 19901                       | 37049             | 44579             | 0             |
| 9230                        | 39538             | 2809              | 14531         |
| 12519                       | 28854             | 2014              | 4267          |
| 9843                        | 33216             | 4038              | 0             |
| 3148                        | 24222             | 67172             | 0             |
| 8083                        | 29614             | 1346              | 0             |
| 12028                       | 26108             | 1139              | 0             |
| 4093                        | 18477             | 5035              | 0             |
| 8075                        | 27879             | 1320              | 0             |
| 7066                        | 24106             | 1337              | 0             |
| 4220                        | 30504             | 2921              | 0             |
| 6857                        | 25735             | 1209              | 2141          |
| 3412                        | 26909             | 26370             | 0             |
| 7817                        | 24593             | 3575              | 640           |
| 6206                        | 26392             | 1289              | 0             |
| 8818                        | 54481             | 17138             | 5506          |



| PDGF Receptor Beta Y751 | PDK1 S241 | PI3K p83 | PKA-C T197 | PKC alpha S657 | PKC delta T505 |
|-------------------------|-----------|----------|------------|----------------|----------------|
| 8182                    | 240386    | 6836     | 26635      | 21928          | 19303          |
| 8674                    | 239261    | 12973    | 21453      | 38998          | 17544          |
| 8850                    | 235673    | 4606     | 23273      | 25472          | 19804          |
| 13202                   | 171959    | 5151     | 46865      | 11289          | 35067          |
| 27729                   | 292322    | 8769     | 26370      | 8123           | 16747          |
| 51044                   | 92967     | 8920     | 46166      | 39735          | 44356          |
| 6341                    | 234524    | 5754     | 24588      | 26543          | 20394          |
| 2150                    | 264345    | 17633    | 11396      | 7687           | 14589          |
| 4951                    | 111441    | 3775     | 26637      | 11710          | 18012          |
| 1686                    | 234453    | 3874     | 14094      | 10027          | 15812          |
| 4942                    | 187250    | 6552     | 18025      | 22697          | 22925          |
| 3170                    | 165316    | 14487    | 20622      | 11521          | 20899          |
| 5078                    | 145076    | 4746     | 21548      | 33531          | 34031          |
| 5408                    | 186281    | 5126     | 23507      | 12103          | 19578          |
| 5646                    | 202805    | 6365     | 21862      | 25981          | 16359          |
| 4822                    | 171959    | 11294    | 14966      | 30033          | 30033          |
| 4021                    | 223822    | 6735     | 20455      | 59576          | 19546          |
| 3690                    | 189699    | 3059     | 21142      | 13975          | 17518          |
| 3609                    | 189245    | 3074     | 21699      | 9433           | 17864          |
| 3855                    | 148814    | 4851     | 92514      | 57822          | 18970          |
| 7084                    | 217510    | 4457     | 23863      | 8880           | 17293          |
| 9321                    | 176310    | 8043     | 18435      | 24466          | 16083          |
| 5384                    | 185350    | 15798    | 20171      | 37051          | 26637          |
| 5134                    | 146578    | 6412     | 18723      | 23624          | 14400          |
| 6207                    | 256687    | 6158     | 20641      | 18987          | 16916          |
| 4911                    | 228662    | 19604    | 23745      | 13543          | 17123          |
| 4108                    | 146534    | 4922     | 62944      | 47340          | 21823          |
| 1998                    | 154278    | 3182     | 24101      | 22697          | 22811          |
| 9469                    | 190044    | 6318     | 19149      | 16952          | 21434          |
| 5692                    | 203824    | 5603     | 19673      | 50524          | 17635          |
| 4857                    | 150242    | 5917     | 16899      | 40143          | 13025          |
| 1641                    | 158786    | 3154     | 26769      | 33860          | 22360          |
| 5817                    | 163736    | 3944     | 11965      | 35242          | 17206          |
| 0                       | 180016    | 2711     | 22360      | 33702          | 13836          |
| 6115                    | 238291    | 4144     | 18500      | 34892          | 15584          |
| 2264                    | 231006    | 2831     | 9756       | 18124          | 13220          |
| 2670                    | 115337    | 3549     | 21917      | 17519          | 16764          |
| 3222                    | 120668    | 3241     | 8947       | 27447          | 11962          |
| 3325                    | 121214    | 3711     | 22026      | 10082          | 12690          |
| 1549                    | 124244    | 3078     | 11420      | 34034          | 21059          |
| 3866                    | 242996    | 3512     | 13726      | 21333          | 14847          |
| 4049                    | 104309    | 3831     | 36865      | 46865          | 24222          |

| PKC theta T538 | PKC zeta/Lamda T410/403 | PKCalpha/betall T638/641 | PLCgamma1 Y783 |
|----------------|-------------------------|--------------------------|----------------|
| 16962          | 16220                   | 8648                     | 7690           |
| 10468          | 14153                   | 26247                    | 9259           |
| 13817          | 14739                   | 10317                    | 12203          |
| 30960          | 35067                   | 3209                     | 5275           |
| 10977          | 13671                   | 16630                    | 12174          |
| 42201          | 18025                   | 30946                    | 25722          |
| 16806          | 25084                   | 15268                    | 3167           |
| 3255           | 21569                   | 2960                     | 5188           |
| 7779           | 13510                   | 4563                     | 4512           |
| 7118           | 15033                   | 1883                     | 3546           |
| 7362           | 25084                   | 9687                     | 7181           |
| 7063           | 33205                   | 4305                     | 6286           |
| 32700          | 29739                   | 14588                    | 9174           |
| 7005           | 17447                   | 4210                     | 7119           |
| 9713           | 25466                   | 10497                    | 6060           |
| 13407          | 22298                   | 11448                    | 5091           |
| 8319           | 14497                   | 49762                    | 7399           |
| 8998           | 16748                   | 3151                     | 4269           |
| 8084           | 10286                   | 2589                     | 3891           |
| 11885          | 21712                   | 40137                    | 3724           |
| 12589          | 13770                   | 14886                    | 6192           |
| 7884           | 19624                   | 26641                    | 5862           |
| 21310          | 77657                   | 21333                    | 6947           |
| 11177          | 11667                   | 13585                    | 4831           |
| 18124          | 22137                   | 11644                    | 6937           |
| 11612          | 34722                   | 6089                     | 6225           |
| 19875          | 20922                   | 35423                    | 6978           |
| 18370          | 11732                   | 12526                    | 3210           |
| 7608           | 26511                   | 7003                     | 8447           |
| 6665           | 14331                   | 32224                    | 5682           |
| 4151           | 15278                   | 16208                    | 4883           |
| 14382          | 15023                   | 19222                    | 3436           |
| 6229           | 17052                   | 17926                    | 9566           |
| 8255           | 21321                   | 27612                    | 0              |
| 6832           | 18001                   | 33531                    | 4927           |
| 5024           | 10586                   | 11616                    | 5817           |
| 3102           | 14878                   | 8869                     | 2782           |
| 3802           | 10057                   | 22150                    | 3596           |
| 8834           | 12153                   | 15090                    | 3576           |
| 8726           | 14855                   | 31895                    | 2068           |
| 4140           | 12568                   | 22708                    | 6556           |
| 30960          | 19264                   | 33692                    | 5003           |

| PLK1 T210 | PRAS40 T246 | PTEN S380 | Pyk2 Y402 | Raf S259 | Ras-GRF1 S916 | Ret Y905 |
|-----------|-------------|-----------|-----------|----------|---------------|----------|
| 17983     | 55282       | 90673     | 9538      | 60585    | 22587         | 2888     |
| 29377     | 35598       | 34373     | 10975     | 162885   | 32059         | 0        |
| 15959     | 41781       | 37613     | 11995     | 75542    | 18630         | 4803     |
| 17250     | 75373       | 10384     | 10363     | 142289   | 34551         | 3941     |
| 19750     | 59594       | 31102     | 12119     | 44704    | 13671         | 7224     |
| 31535     | 70637       | 88473     | 25860     | 100836   | 59583         | 9444     |
| 22461     | 107023      | 20763     | 7778      | 121178   | 17268         | 553      |
| 15727     | 36682       | 5626      | 6902      | 75812    | 18583         | 850      |
| 19551     | 22584       | 10944     | 6463      | 54350    | 11802         | 1601     |
| 10253     | 46639       | 2198      | 3750      | 59666    | 11756         | 1872     |
| 21140     | 37610       | 20181     | 8727      | 85033    | 14489         | 2676     |
| 20342     | 67508       | 5403      | 5814      | 72461    | 14589         | 0        |
| 29684     | 58105       | 31259     | 15169     | 90382    | 45707         | 0        |
| 17779     | 30486       | 24711     | 19026     | 45789    | 33523         | 1080     |
| 40938     | 44356       | 11118     | 11679     | 122432   | 21429         | 0        |
| 34447     | 79619       | 14887     | 13135     | 82557    | 21484         | 0        |
| 17153     | 21141       | 20021     | 43487     | 43853    | 29594         | 0        |
| 16104     | 31417       | 3435      | 6300      | 88081    | 30340         | 1860     |
| 14614     | 20015       | 24959     | 4727      | 46065    | 12354         | 1582     |
| 23009     | 34207       | 22818     | 10373     | 140112   | 36502         | 1231     |
| 23156     | 27186       | 65187     | 11879     | 98958    | 12444         | 0        |
| 38634     | 34892       | 26372     | 12813     | 101742   | 23629         | 1751     |
| 14271     | 33357       | 77274     | 9968      | 150272   | 20952         | 1369     |
| 10619     | 17159       | 21605     | 4524      | 114743   | 10386         | 0        |
| 22900     | 59278       | 14472     | 16027     | 100755   | 30186         | 906      |
| 20774     | 102744      | 8991      | 7548      | 179908   | 20859         | 1213     |
| 42655     | 31414       | 28288     | 14018     | 107507   | 28428         | 0        |
| 13352     | 15828       | 25466     | 16165     | 76773    | 11631         | 1399     |
| 18584     | 49516       | 18463     | 21100     | 107507   | 24343         | 0        |
| 26788     | 40337       | 25978     | 18630     | 74667    | 21764         | 0        |
| 10158     | 8747        | 2072      | 8276      | 10062    | 4157          | 0        |
| 48074     | 33035       | 36770     | 18965     | 79906    | 53923         | 0        |
| 40127     | 23862       | 21496     | 30640     | 83727    | 64545         | 0        |
| 12620     | 19624       | 23157     | 4106      | 90022    | 32874         | 0        |
| 24470     | 17101       | 42193     | 13389     | 229811   | 23634         | 0        |
| 21530     | 23520       | 32209     | 9336      | 26370    | 10573         | 0        |
| 32220     | 20248       | 20057     | 5572      | 51792    | 11838         | 0        |
| 16998     | 22702       | 18186     | 9771      | 85418    | 17873         | 0        |
| 15732     | 26247       | 11092     | 5471      | 57057    | 13603         | 0        |
| 27151     | 16915       | 21995     | 5805      | 56616    | 22930         | 0        |
| 22878     | 27179       | 27481     | 8717      | 114189   | 13914         | 0        |
| 21843     | 45950       | 24719     | 12665     | 95817    | 32866         | 2282     |

| RSK3 T356/S360 | S6 Ribosomal Protein S240/S244 | Shc Y317 | Smad1(S/S)-Smad5(S/S)-Smad8(S/S) |
|----------------|--------------------------------|----------|----------------------------------|
| 3465           | 57526                          | 0        | 3486                             |
| 5514           | 34892                          | 0        | 2256                             |
| 11846          | 12360                          | 847      | 2594                             |
| 2567           | 16867                          | 0        | 7417                             |
| 624            | 1428                           | 1216     | 3368                             |
| 4681           | 13018                          | 0        | 15584                            |
| 8069           | 4095                           | 0        | 5708                             |
| 2984           | 3667                           | 0        | 2284                             |
| 1270           | 1500                           | 0        | 4254                             |
| 2971           | 10589                          | 0        | 3293                             |
| 2893           | 3188                           | 0        | 13050                            |
| 12519          | 11032                          | 0        | 7033                             |
| 20645          | 2388                           | 0        | 7457                             |
| 4088           | 4122                           | 0        | 6554                             |
| 14682          | 53376                          | 0        | 4249                             |
| 17150          | 40137                          | 0        | 3762                             |
| 22702          | 3193                           | 0        | 6910                             |
| 1902           | 5634                           | 0        | 9892                             |
| 4228           | 2538                           | 0        | 7503                             |
| 4760           | 6701                           | 0        | 7318                             |
| 12618          | 1943                           | 0        | 3762                             |
| 8674           | 9500                           | 0        | 3911                             |
| 13939          | 2604                           | 0        | 3155                             |
| 11968          | 3513                           | 0        | 7462                             |
| 11808          | 51021                          | 0        | 3962                             |
| 17493          | 26108                          | 0        | 8740                             |
| 5114           | 3882                           | 0        | 63896                            |
| 5462           | 2075                           | 0        | 7317                             |
| 16650          | 6622                           | 0        | 5235                             |
| 13265          | 21812                          | 0        | 5720                             |
| 1053           | 978                            | 0        | 1870                             |
| 18251          | 28001                          | 0        | 13441                            |
| 7978           | 5779                           | 0        | 4359                             |
| 5402           | 9942                           | 0        | 5941                             |
| 17812          | 2436                           | 0        | 2575                             |
| 4184           | 8960                           | 0        | 6980                             |
| 4587           | 1723                           | 0        | 3199                             |
| 3655           | 5800                           | 0        | 924                              |
| 4696           | 2185                           | 0        | 2086                             |
| 15870          | 7432                           | 0        | 3811                             |
| 23399          | 3958                           | 0        | 2270                             |
| 42619          | 28711                          | 0        | 41565                            |

| Smad2 S245/250/255 | Smad2 S465/467 | Src Family Y416 | Src Y527 | ST6GALNAC5 | Stat1 Y701 |
|--------------------|----------------|-----------------|----------|------------|------------|
| 6937               | 17457          | 8161            | 25210    | 29882      | 8682       |
| 8510               | 14507          | 22577           | 43917    | 25592      | 10400      |
| 6508               | 12199          | 21142           | 50034    | 11451      | 8925       |
| 5050               | 36865          | 10766           | 27038    | 69259      | 11043      |
| 5861               | 14662          | 5736            | 21216    | 21221      | 8579       |
| 11300              | 36680          | 11528           | 15285    | 67521      | 15979      |
| 8481               | 25720          | 5243            | 62637    | 60779      | 4581       |
| 8703               | 8614           | 4592            | 7805     | 18904      | 10389      |
| 5165               | 11100          | 6403            | 11424    | 47574      | 14109      |
| 4095               | 9799           | 5222            | 4747     | 14883      | 10663      |
| 6924               | 24343          | 5359            | 17240    | 23995      | 18197      |
| 6992               | 15499          | 6749            | 21908    | 14293      | 15245      |
| 7930               | 34544          | 11032           | 26239    | 28425      | 11533      |
| 4937               | 13982          | 40946           | 44365    | 21860      | 6295       |
| 10663              | 19419          | 8566            | 32866    | 23995      | 7943       |
| 6792               | 14832          | 8178            | 29594    | 23513      | 21280      |
| 5600               | 14723          | 43099           | 48089    | 24763      | 11015      |
| 7709               | 10098          | 7567            | 8195     | 18814      | 10022      |
| 8536               | 23624          | 6189            | 11156    | 13896      | 9155       |
| 6553               | 12824          | 11199           | 42636    | 35970      | 7094       |
| 4929               | 17536          | 13247           | 18574    | 24387      | 6270       |
| 3546               | 12168          | 16833           | 22249    | 18779      | 6758       |
| 5157               | 21058          | 14266           | 48053    | 66510      | 7675       |
| 5351               | 18252          | 4097            | 8885     | 65526      | 4030       |
| 6045               | 11228          | 15343           | 25338    | 19510      | 5242       |
| 9009               | 31578          | 9211            | 41983    | 34728      | 7609       |
| 9586               | 17935          | 22236           | 15378    | 20377      | 7116       |
| 4367               | 12759          | 10184           | 13428    | 23390      | 11551      |
| 2978               | 9368           | 18444           | 102750   | 17759      | 9877       |
| 3388               | 9947           | 28714           | 80826    | 15004      | 7735       |
| 2227               | 8031           | 4273            | 818      | 26242      | 6634       |
| 9128               | 15948          | 9948            | 23778    | 20817      | 13515      |
| 4919               | 14476          | 19909           | 38592    | 16672      | 8072       |
| 11385              | 18712          | 12494           | 8493     | 12043      | 10409      |
| 2981               | 11956          | 16065           | 22115    | 17899      | 5522       |
| 4673               | 9594           | 6534            | 10631    | 12588      | 6381       |
| 5897               | 18692          | 4696            | 13620    | 21070      | 7666       |
| 5651               | 9237           | 5872            | 7813     | 14711      | 6366       |
| 4652               | 17232          | 2752            | 25218    | 19730      | 4404       |
| 4740               | 15049          | 3667            | 18370    | 15556      | 11708      |
| 2699               | 8068           | 5825            | 19372    | 40742      | 7763       |
| 6704               | 18052          | 10118           | 57902    | 67273      | 8969       |

| Stat3 S727 | Stat3 Y705 | Stat5 Y694 | Total EGFR | total NOTCH 1 | Total PTEN | Tuberin/TSC2 Y1571 |
|------------|------------|------------|------------|---------------|------------|--------------------|
| 9486       | 7730       | 16556      | 3891       | 31111         | 103261     | 51534              |
| 14914      | 9070       | 2970       | 11822      | 24031         | 45027      | 49516              |
| 2742       | 2082       | 22410      | 4117       | 17033         | 39939      | 45951              |
| 17899      | 12055      | 2755       | 2986       | 51032         | 8827       | 48533              |
| 12875      | 4653       | 20020      | 4459       | 19387         | 34546      | 49021              |
| 14480      | 14899      | 35419      | 6952       | 52319         | 104841     | 53371              |
| 14226      | 4385       | 2217       | 5288       | 30663         | 13568      | 46633              |
| 11956      | 5282       | 835        | 4496       | 11953         | 5643       | 30182              |
| 15875      | 4448       | 2202       | 3731       | 21388         | 12218      | 46630              |
| 4372       | 7912       | 927        | 3551       | 26772         | 2725       | 46865              |
| 6115       | 7713       | 1637       | 13017      | 49524         | 23745      | 54996              |
| 9100       | 2721       | 1117       | 12179      | 23872         | 3152       | 35598              |
| 25084      | 5236       | 1505       | 10379      | 36316         | 37423      | 54721              |
| 52314      | 7503       | 3038       | 29585      | 25591         | 24836      | 49021              |
| 28142      | 8483       | 1252       | 10518      | 27447         | 9682       | 50263              |
| 47811      | 4082       | 1338       | 12252      | 26370         | 12395      | 53371              |
| 15011      | 4683       | 4727       | 10017      | 31740         | 17784      | 51809              |
| 9629       | 11228      | 1260       | 4844       | 28714         | 3674       | 43478              |
| 4687       | 6776       | 1341       | 3571       | 27871         | 27038      | 43917              |
| 15260      | 7466       | 2492       | 6662       | 31733         | 24736      | 45937              |
| 4436       | 4827       | 1606       | 5254       | 35441         | 66174      | 41357              |
| 16950      | 6033       | 2221       | 13672      | 26937         | 30031      | 46398              |
| 20963      | 11693      | 2287       | 7476       | 30801         | 105895     | 54721              |
| 24588      | 8502       | 840        | 8813       | 26266         | 34546      | 43478              |
| 32533      | 5603       | 2140       | 11123      | 26403         | 15367      | 43696              |
| 10353      | 9211       | 1289       | 13873      | 23407         | 6181       | 49513              |
| 3664       | 4772       | 1128       | 4775       | 27865         | 38179      | 44804              |
| 6592       | 0          | 3205       | 1540       | 23399         | 26637      | 46398              |
| 15678      | 6708       | 3911       | 5186       | 29885         | 16675      | 47811              |
| 7052       | 5964       | 3047       | 10562      | 21280         | 23390      | 47099              |
| 4077       | 5961       | 709        | 8527       | 20558         | 21464      | 39735              |
| 55826      | 3323       | 2467       | 4638       | 23389         | 45484      | 43701              |
| 19377      | 8859       | 3909       | 9403       | 45032         | 19325      | 47816              |
| 6226       | 0          | 2066       | 10233      | 22698         | 19594      | 44811              |
| 7923       | 6849       | 1520       | 10228      | 33565         | 37423      | 53114              |
| 10658      | 4615       | 1385       | 4012       | 24962         | 24588      | 43924              |
| 10052      | 5266       | 1215       | 4504       | 26372         | 21573      | 51283              |
| 3954       | 6353       | 1783       | 34207      | 23745         | 17616      | 44583              |
| 2587       | 6433       | 915        | 3475       | 40143         | 9109       | 49031              |
| 6826       | 5224       | 601        | 7328       | 23041         | 22697      | 51293              |
| 7131       | 7418       | 1520       | 5736       | 50014         | 28603      | 49524              |
| 26637      | 12391      | 1710       | 7398       | 33531         | 26529      | 43917              |

| VEGFR Y996 | VEGFR2 Y1175 | VEGFR2 Y951 |
|------------|--------------|-------------|
| 30045      | 13021        | 4286        |
| 37866      | 8942         | 4292        |
| 33692      | 12576        | 6536        |
| 33407      | 10327        | 2969        |
| 26141      | 16447        | 4533        |
| 68598      | 24949        | 7337        |
| 22812      | 8221         | 1910        |
| 30644      | 6395         | 4910        |
| 22811      | 9038         | 2341        |
| 19884      | 2650         | 2912        |
| 32068      | 3876         | 4298        |
| 24962      | 5108         | 3516        |
| 46864      | 13294        | 8083        |
| 37610      | 27676        | 7076        |
| 38813      | 14697        | 3839        |
| 54449      | 24575        | 11995       |
| 55963      | 9869         | 4890        |
| 23506      | 5444         | 2956        |
| 21765      | 3014         | 3996        |
| 23866      | 8876         | 2199        |
| 30347      | 3021         | 3719        |
| 29739      | 9585         | 2748        |
| 37799      | 11625        | 5272        |
| 33250      | 12714        | 4394        |
| 30191      | 17337        | 3280        |
| 31071      | 5821         | 3884        |
| 35286      | 2396         | 3180        |
| 30182      | 4898         | 3715        |
| 43274      | 9795         | 5062        |
| 35242      | 5049         | 2963        |
| 31991      | 2393         | 5303        |
| 46403      | 29146        | 6975        |
| 45607      | 11643        | 5201        |
| 30086      | 4146         | 10071       |
| 33190      | 4721         | 4599        |
| 37798      | 6021         | 3952        |
| 37079      | 5634         | 5083        |
| 31611      | 2869         | 3455        |
| 27862      | 1751         | 9080        |
| 31271      | 3713         | 4932        |
| 34907      | 4325         | 3940        |
| 39935      | 14173        | 2924        |
